# Supplementary material for: Formation of the ST12 phase in nanocrystalline Ge at ambient pressure
Source: Royal Society of Chemistry journal article supplement (doi:10.1039/b915841c), 2009-11-04
Supplement: b915841c.pdf [file b915841c.pdf]

**Formation of the ST12 phase in nanocrystalline Ge at ambient pressure:  
Supporting Information**

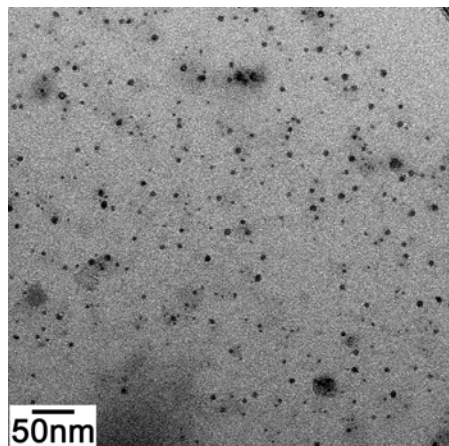

**Figure S1.** Brightfield TEM image of Ge nanocrystals formed from supernatant of TB-Ge after annealing at 500 °C is the evidence of thermolysis.

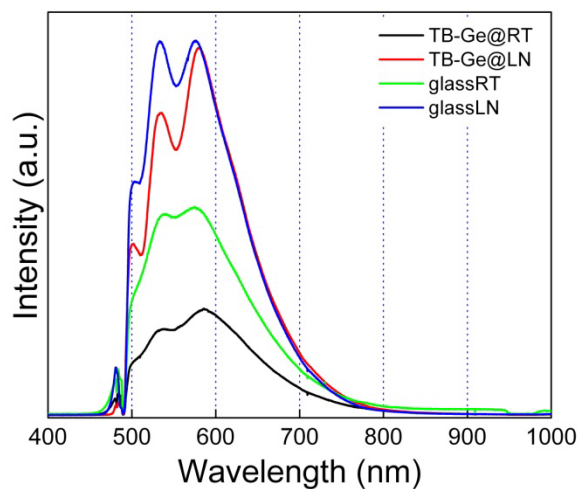

**Figure S2.** Photoluminescence (PL) of materials collected from supernatant of TB-Ge, after annealing at 500 °C for 2 h under Ar atmosphere. PL was measured at 298 K (RT) and at 77 K (LN). Background PL produced by glass substrate is included for comparison.

**Table S1.** Summary of 2 $\theta$  values and relative intensities of XRD peaks collected from NB-Ge and TB-Ge samples, compared with JCPDS data for ST12-Ge, diamond cubic (Ge-I), and NaCl.

| ST12-Ge <sup>a</sup> |            |      | Ge-I <sup>b</sup> |            |      | NaCl <sup>c</sup> |            |      | NB-Ge <sup>d</sup> |      | NB-Ge <sup>e</sup> |      | TB-Ge <sup>e,f</sup> |      |
|----------------------|------------|------|-------------------|------------|------|-------------------|------------|------|--------------------|------|--------------------|------|----------------------|------|
| <i>hkl</i>           | 2 $\theta$ | Int. | <i>hkl</i>        | 2 $\theta$ | Int. | <i>hkl</i>        | 2 $\theta$ | Int. | 2 $\theta$         | Int. | 2 $\theta$         | Int. | 2 $\theta$           | Int. |
| 102                  | 29.7       | 41   | 111               | 27.3       | 100  |                   |            |      |                    |      | 27.5               | 20   |                      |      |
| 201                  | 32.8       | 100  |                   |            |      | 200               | 32.8       | 100  | 31.6               | 100  | 31.8               | 100  | 31.8                 | 100  |
| 112                  | 33.4       | 26   |                   |            |      |                   |            |      |                    |      |                    |      |                      |      |
|                      |            |      | 220               | 45.3       | 57   | 220               | 47.1       | 54   |                    |      | 45.5               | 37   | 45.5                 | 57   |
| 222                  | 50.8       | 35   | 311               | 53.7       | 39   | 311               | 55.9       | 2    |                    |      | 56.5               | 13   |                      |      |
|                      |            |      |                   |            |      | 222               | 58.6       | 15   |                    |      |                    |      |                      |      |
|                      |            |      | 400               | 66.0       | 7    |                   |            |      |                    |      |                    |      |                      |      |

<sup>a</sup> JCPDS No. 72-1089. <sup>b</sup> JCPDS No. 04-0545. <sup>c</sup> JCPDS No. 83-1728. <sup>d</sup> Collected from supernatant. <sup>e</sup> Collected from sediment. <sup>f</sup> No measurable signals were obtained from supernatant of TB-Ge.
